# Supplementary material
Source: Springer Nature journal article supplement (https://www.springermedizin.de/resource/supplementary/12995_2008_81_MOESM1_ESM.pdf/9622636)
Supplement: MOESM1 [file 9622636]

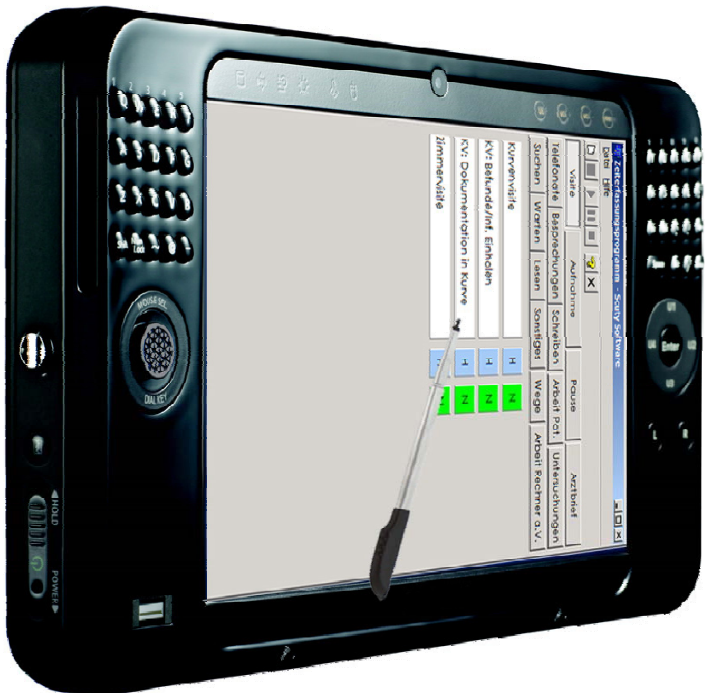

Zeitfassungsprogramm - Scity Software

Datei Öffnen

Drucken

Aufschreiben

Schreiben

Sonstiges

Warten

Lesen

Kundenliste

KV: Belunde/inf. Einholen

KV: Dokumentation in Kurve

Zimmerliste

Pause

Arbeit Pst.

Warte

Arbeit Rechner a.V.

Untersuchungen

Arztbesuch

H

H

H

N

N

N
